# Supplementary material
Source: publisher figshare collection journal article supplement (https://rs.figshare.com/ndownloader/files/24316236)
Supplement: Supplementary file 1 [file 24316236]

## Sheet: Metadata
	Dataset S3. Data on tadpole snout-vent length
	Genus and family-level taxonomy follows that used in Pyron and Wiens (2013)
	Species are listed alphabetically by genus and species names
	Tadpole data are the maximum size recorded for each species, either snout-vent length (SVL, excluding the tail) or total length (including the tail)
	Female adult size is the mean snout-vent length (SVL) among adult females for each species
	Sources are given in Dataset S1.
	Correlated and decoupled evolution of adult and larval body size in frogs
	Tung X. Phung, João C. S. Nascimento, Alexander J. Novarro, John J. Wiens
	Proceedings of the Royal Society of London B, Biological Sciences
	10.1098/rspb

## Sheet: Dataset S3
Species	Family	Tadpole SVL	Tadpole total length	Female adult SVL
Acanthixalus_sonjae	Hyperoliidae	22	47	37
Acris_crepitans	Hylidae	15	32.5	27
Acris_gryllus	Hylidae	13	42.2	24.5
Agalychnis_annae	Hylidae	18.25	46.85	69.6
Agalychnis_callidryas	Hylidae	18.4	50.5	65.7
Agalychnis_saltator	Hylidae	13.8	40.2	54.75
Agalychnis_spurrelli	Hylidae	19.5	41.5	76.5
Aglyptodactylus_laticeps	Mantellidae	10.1	36.6	60.4
Aglyptodactylus_madagascariensis	Mantellidae	8.3	25.75	50.9
Ameerega_bilinguis	Dendrobatidae	7.28	24.83	20.95
Ameerega_parvula	Dendrobatidae	8.5	24.88	22.5
Amietia_vertebralis	Pyxicephalidae	17.1	76.6	38
Amolops_hainanensis	Ranidae	16	50	73
Anotheca_spinosa	Hylidae	17.1	45.3	69
Ansonia_longidigita	Bufonidae	5.6	14.8	60
Aplastodiscus_callipygius	Hylidae	20.29	63.62	47.5
Ascaphus_truei	Ascaphidae	18	58	45.5
Atelognathus_patagonicus	Batrachylidae	27.5	57	50
Atelopus_spumarius	Bufonidae	7.5	15	35
Batrachyla_taeniata	Batrachylidae	13.7	36	39
Bombina_variegata	Bombinatoridae	14.7	52	44.6
Bufo_bufo	Bufonidae	12.43	32	100
Bufo_gargarizans	Bufonidae	9	24	79
Ceratophrys_cornuta	Ceratophryidae	19	56	99.5
Chaperina_fusca	Microhylidae	7.25	21.1	23
Chiromantis_vittatus	Rhacophoridae	10	33	32
Conraua_goliath	Conrauidae	15	45	245
Cophyla_phyllodactyla	Microhylidae	4.5	14.5	29
Cruziohyla_calcarifer	Hylidae	20.5	52.8	72.5
Cyclorana_brevipes	Hylidae	16.05	75	42
Dendropsophus_ebraccatus	Hylidae	11	29.4	32.5
Dendropsophus_parviceps	Hylidae	6.08	18.9	23.5
Dendropsophus_rhodopeplus	Hylidae	5.1	16.2	27.5
Dendropsophus_sarayacuensis	Hylidae	8.9	22.5	35.5
Dendropsophus_triangulum	Hylidae	7.5	15.2	39
Duellmanohyla_rufioculis	Hylidae	14.7	40.9	36.5
Edalorhina_perezi	Leptodactylidae	10.36	28	37.5
Euphlyctis_cyanophlyctis	Dicroglossidae	24.5	71	58.75
Euphlyctis_hexadactylus	Dicroglossidae	12	35	130
Eupsophus_calcaratus	Alsodidae	8.04	23.41	48
Fejervarya_cancrivora	Dicroglossidae	16.08	38	80
Gastrophryne_carolinensis	Microhylidae	10	27.5	28
Gastrophryne_olivacea	Microhylidae	10	37	30.5
Gephyromantis_pseudoasper	Mantellidae	10.7	34	33
Guibemantis_depressiceps	Mantellidae	15	42	35
Guibemantis_liber	Mantellidae	10	35	27.5
Hadromophryne_natalensis	Heleophrynidae	25.3	85	55
Hamptophryne_boliviana	Microhylidae	10.5	30	41.5
Hemisus_marmoratus	Hemisotidae	15.8	55	43
Hoplobatrachus_tigerinus	Dicroglossidae	17.3	50	137.5
Huia_cavitympanum	Ranidae	23.55	68.5	74
Hyla_arborea	Hylidae	16	49	40
Hyla_arenicolor	Hylidae	15.4	31	44.5
Hyla_avivoca	Hylidae	10.1	39	42
Hyla_chinensis	Hylidae	26	42	40
Hyla_chrysoscelis	Hylidae	13.76	21	46
Hyla_cinerea	Hylidae	15	40	57
Hyla_femoralis	Hylidae	12.5	33	34.5
Hyla_gratiosa	Hylidae	19	50	60.5
Hyla_squirella	Hylidae	12	32	33.5
Hyla_versicolor	Hylidae	15.8	38	46
Hyloxalus_sauli	Dendrobatidae	7.8	24.2	23.5
Hymenochirus_boettgeri	Pipidae	9	21	35
Hyperolius_pusillus	Hyperolidae	10	35	22
Hypsiboas_boans	Hylidae	15.05	43	99
Hypsiboas_lanciformis	Hylidae	14	45	88.5
Indirana_beddomii	Ranixalidae	11.48	26.4	40.2
Isthmohyla_pseudopuma	Hylidae	33.5	30.55	47.6
Kalophrynus_pleurostigma	Microhylidae	4.25	12.1	50
Kassina_maculata	Hyperolidae	40	130	68.5
Laliostoma_labrosum	Mantellidae	15	44	57
Leiopelma_archeyi	Leiopelmatidae	8.1	20.4	35.5
Leiopelma_hochstetteri	Leiopelmatidae	8.65	20.77	43.5
Leptobrachium_ailaonicum	Megophryidae	40.6	104.1	81.6
Leptobrachium_boringii	Megophryidae	39	117	67.3
Leptodactylus_chaquensis	Leptodactylidae	18.1	44	80.7
Leptodactylus_melanonotus	Leptodactylidae	13.5	40	45
Leptodactylus_mystacinus	Leptodactylidae	17	40	60.5
Leptodactylus_pentadactylus	Leptodactylidae	20.47	83	153
Leptodactylus_rhodomystax	Leptodactylidae	17.4	50.66	98.5
Limnonectes_blythii	Dicroglossidae	10.3	36	152.5
Limnonectes_finchi	Dicroglossidae	7.9	23	42
Limnonectes_microdiscus	Dicroglossidae	11.33	37	27
Lithodytes_lineatus	Leptodactylidae	18.15	55	52
Litoria_spenceri	Hylidae	14.5	37.5	52
Megophrys_nasuta	Megophryidae	12.5	42.2	107.5
Micryletta_inornata	Microhylidae	7.64	19.1	27.5
Nelsonophryne_aequatorialis	Microhylidae	14.4	39	36.5
Odontophrynus_cultripes	Odontophrynidae	12.5	40	58
Odorrana_jingdongensis	Ranidae	16	34	36.15
Odorrana_schmackeri	Ranidae	15	45	80
Oreolalax_lichuanensis	Megophryidae	22	72	59
Oreolalax_pingii	Megophryidae	25	64	52
Osteocephalus_taurinus	Hylidae	18.3	38.3	89.5
Paratelmatobius_poecilogaster	Leptodactylidae	8.1	25.8	27.65
Pedostibes_hosii	Bufonidae	8.3	19.5	97.5
Pelobates_cultripes	Pelobatidae	40	70.67	77
Pelodytes_punctatus	Pelodytidae	20.09	38.33	42.5
Petropedetes_martiensseni	Petropedetidae	7.9	29.6	55
Phrynomantis_bifasciatus	Microhylidae	12	37	70
Phyllomedusa_palliata	Hylidae	15	48	44
Phyllomedusa_tarsius	Hylidae	18	50	105.5
Phyllomedusa_tomopterna	Hylidae	23	64	57.5
Phyllomedusa_vaillantii	Hylidae	19	52	78.5
Poyntonia_paludicola	Pyxicephalidae	8.96	32	26.5
Pseudacris_brachyphona	Hylidae	10.5	25	29.5
Pseudacris_crucifer	Hylidae	14	33	27
Pseudacris_nigrita	Hylidae	8	23	29
Pseudacris_ocularis	Hylidae	8.8	23	14.75
Pseudacris_regilla	Hylidae	16	44	36
Pseudacris_streckeri	Hylidae	12	33	48
Ptychadena_tellinii	Ptychadenidae	14	47	41.5
Ramanella_obscura	Microhylidae	10.62	27.64	33.5
Rana_amurensis	Ranidae	13	32	66.5
Rana_arvalis	Ranidae	16	43	75
Rana_aurora	Ranidae	20	75	93.5
Rana_boylii	Ranidae	26.5	50	57
Rana_cascadae	Ranidae	22	70	52.5
Rana_catesbeiana	Ranidae	46	162	155
Rana_clamitans	Ranidae	35.1	87	72
Rana_dalmatina	Ranidae	18	59	70
Rana_graeca	Ranidae	18	48	75
Rana_grylio	Ranidae	35.6	100	123
Rana_hosii	Ranidae	11	38	92.5
Rana_iberica	Ranidae	14	44	47
Rana_muscosa	Ranidae	22	50	62.5
Rana_palmipes	Ranidae	37	92	102
Rana_palustris	Ranidae	27	75.8	66
Rana_pipiens	Ranidae	28	87	89.5
Rana_pretiosa	Ranidae	25.5	75	76.5
Rana_pyrenaica	Ranidae	14.2	36.8	45
Rana_sphenocephala	Ranidae	25.5	62.5	89
Rana_sylvatica	Ranidae	19	50	59
Rana_temporaria	Ranidae	15	45	65
Rhacophorus_annamensis	Rhacophoridae	13.22	43.27	86.8
Rhinophrynus_dorsalis	Rhinophrynidae	16.67	45	74
Scaphiophryne_marmorata	Microhylidae	14.2	38.1	39.2
Scaphiophryne_menabensis	Microhylidae	11.87	31	43.9
Scaphiopus_couchii	Scaphiopodidae	12.31	31	69.5
Scaphiopus_holbrookii	Scaphiopodidae	12	28	63.5
Scinax_boulengeri	Hylidae	13	33.5	47.5
Scinax_elaeochroa	Hylidae	11.2	27.8	35
Scinax_garbei	Hylidae	9	29	43
Scinax_ruber	Hylidae	9.9	24.3	40.5
Smilisca_phaeota	Hylidae	14	39.8	64
Spea_multiplicata	Scaphiopodidae	20	34.2	51
Tachycnemis_seychellensis	Hyperolidae	12	44	64
Telmatobufo_venustus	Calyptocephalellidae	39.7	107.4	76
Trachycephalus_venulosus	Hylidae	17	49	103.5
Uperodon_systoma	Microhylidae	16.5	27.25	55
Xenopus_laevis	Pipidae	13.9	37	100
